# Supplementary material
Source: publisher figshare collection journal article supplement (https://aacr.figshare.com/ndownloader/files/39812457)
Supplement: Supplementary file 1 [file 39812457]

**Supplementary Figure 1.** RAC1-GTP levels in the presence of RAC1 inhibitor. Myeloid (Mac-1+) cells were purified from the spleens of FVBN wild-type and *NRAS* transgenic mice and incubated with DMSO vehicle or NSC23766. RAC1-GTP levels were measured via the pull-down assay.
